# Supplementary material
Source: MDPI journal article supplement (https://www.mdpi.com/2072-4292/14/18/4671)
Supplement: s1 [file s1 › remotesensing-1889629-supplementary.pdf]

# Supplementary Material: An integrated quantitative method based on ArcGIS evaluating the contribution of rural straw open burning to urban fine particulate pollution

Xin Wen<sup>1</sup>, Weiwei Chen<sup>1\*</sup>, Pingyu Zhang<sup>1</sup>, Jie Chen<sup>2</sup>, Guoqing Song<sup>3</sup>

<sup>1</sup> Northeast Institute of Geography and Agroecology, Chinese Academy of Sciences, Changchun 130102, China

<sup>2</sup> National Satellite Meteorological Center, Beijing 100081, China

<sup>3</sup> School of Biological and Agricultural Engineering, Jilin University, Changchun 130022, China

Here additional table and figures are presented that should help the reader to better understand the facts presented in the article in addition to the figures and tables already present in the article itself.

## Supplement 1

Supplement Figure S1 shows the procedure for identifying potential SOB sources of PE III1.

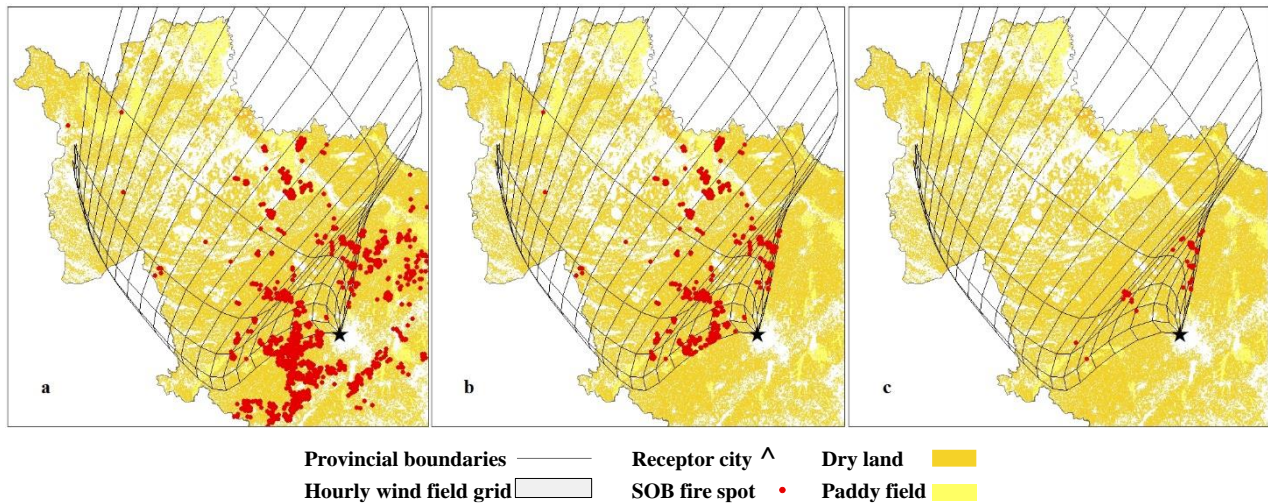

**Figure S1.** Schematic of identifying potential straw open burning sources.

Note: Fire spots in Figure 4a are SOB-caused fire occurred on April 6-7 in province-wide farmland, that is, the satellite wildfire data with acquisition time of April 6-7 extracted by the spatial distribution of farmland. Fire spots in Figure 4b are SOB-caused fire occurred on April 6-7 in PE III1's HWFGs, that is, SOB-caused fire with acquisition time of April 6-7 extracted by the spatial scope of HWFGs during PEIII1. Fire spots in Figure 4c are SOB-caused fire whose burning time are during the air mass passing through, that is, SOB-caused fire whose acquisition time are within three hours before the pathway time of their located grids.

## Supplement 2

Supplement Table S1 shows the computation table of PM<sub>2.5-inflow</sub> contribution to urban hourly average PM<sub>2.5</sub> concentration.

**Table S1.** Computation table of PM<sub>2.5-inflow</sub> contribution to urban hourly average PM<sub>2.5</sub> concentration.

| Periods | PM <sub>2.5-inflow</sub><br>concentration | The urban<br>hourly<br>average<br>concentration | Contribution<br>to $\bar{C}_{rc}$<br>during 1 <sup>st</sup> hour<br>of residence<br>time | Contribution to<br>$\bar{C}_{rc}$<br>during the 2 <sup>nd</sup><br>hour of<br>residence time | Contribution to<br>$\bar{C}_{rc}$<br>during the 3 <sup>rd</sup><br>hour of<br>residence time | ... | Contribution to<br>$\bar{C}_{rc}$<br>during the m <sup>th</sup><br>period of<br>residence time | ... |
|---------|-------------------------------------------|-------------------------------------------------|------------------------------------------------------------------------------------------|----------------------------------------------------------------------------------------------|----------------------------------------------------------------------------------------------|-----|------------------------------------------------------------------------------------------------|-----|
|---------|-------------------------------------------|-------------------------------------------------|------------------------------------------------------------------------------------------|----------------------------------------------------------------------------------------------|----------------------------------------------------------------------------------------------|-----|------------------------------------------------------------------------------------------------|-----|

|          |                  |                             |                                              |                                                 |                                                 |          |                                              |     |
|----------|------------------|-----------------------------|----------------------------------------------|-------------------------------------------------|-------------------------------------------------|----------|----------------------------------------------|-----|
| $\tau_1$ | $C_{n_{\tau 1}}$ | $\overline{C_{rc}(\tau_1)}$ | $\overline{C_{rc}(\tau_1)}_{C_{n_{\tau 1}}}$ |                                                 |                                                 |          |                                              |     |
| $\tau_2$ | $C_{n_{\tau 2}}$ | $\overline{C_{rc}(\tau_2)}$ | $\overline{C_{rc}(\tau_2)}_{C_{n_{\tau 2}}}$ | $\overline{C_{rc}(\tau_2)}_{C_{n_{\tau 1}}}$    |                                                 |          |                                              |     |
| $\tau_3$ | $C_{n_{\tau 3}}$ | $\overline{C_{rc}(\tau_3)}$ | $\overline{C_{rc}(\tau_3)}_{C_{n_{\tau 3}}}$ | $\overline{C_{rc}(\tau_3)}_{C_{n_{\tau 2}}}$    | $\overline{C_{rc}(\tau_3)}_{C_{n_{\tau 1}}}$    |          |                                              |     |
| $\vdots$ | $\vdots$         | $\vdots$                    | $\vdots$                                     | $\vdots$                                        | $\vdots$                                        | $\ddots$ |                                              |     |
| $\tau_m$ | $C_{n_{\tau m}}$ | $\overline{C_{rc}(\tau_m)}$ | $\overline{C_{rc}(\tau_m)}_{C_{n_{\tau m}}}$ | $\overline{C_{rc}(\tau_m)}_{C_{n_{\tau(m-1)}}}$ | $\overline{C_{rc}(\tau_m)}_{C_{n_{\tau(m-2)}}}$ | ...      | $\overline{C_{rc}(\tau_m)}_{C_{n_{\tau 1}}}$ |     |
| $\vdots$ | $\vdots$         | $\vdots$                    | $\vdots$                                     | $\vdots$                                        | $\vdots$                                        | ...      | ...                                          | ... |
| $\tau_k$ | $C_{n_{\tau k}}$ | $\overline{C_{rc}(\tau_k)}$ | $\overline{C_{rc}(\tau_k)}_{C_{n_{\tau k}}}$ | $\overline{C_{rc}(\tau_k)}_{C_{n_{\tau(k-1)}}}$ | $\overline{C_{rc}(\tau_k)}_{C_{n_{\tau(k-2)}}}$ | ...      | ...                                          | ... |

### Supplement 3

Supplement Table S2 shows hourly and staged average contribution of straw open burning sources during PE II and PE III.

**Table S2.** Hourly and staged average contribution of straw open burning sources during PE II and PE III.

| PE     | Stage             | Time<br>(yyyy-mm-dd hh) | Hourly average                           |                                          |                                                           | Staged average                           |                                          |                                                           |
|--------|-------------------|-------------------------|------------------------------------------|------------------------------------------|-----------------------------------------------------------|------------------------------------------|------------------------------------------|-----------------------------------------------------------|
|        |                   |                         | Urban PM <sub>2.5</sub><br>concentration | Contribution<br>of straw open<br>burning | Proportion of<br>contribution of<br>straw open<br>burning | Urban PM <sub>2.5</sub><br>concentration | Contribution<br>of straw open<br>burning | Proportion of<br>contribution of<br>straw open<br>burning |
| PE II  | Before            | 2021-04-07 17           | 44                                       | 0.0046                                   | 0.010%                                                    | 55                                       | 0.15                                     | 0.27%                                                     |
|        |                   | 2021-04-07 18           | 51                                       | 0.031                                    | 0.060%                                                    |                                          |                                          |                                                           |
|        |                   | 2021-04-07 19           | 70                                       | 0.41                                     | 0.59%                                                     |                                          |                                          |                                                           |
|        | During-<br>1st PS | 2021-04-07 20           | 125                                      | 35                                       | 28%                                                       | 233                                      | 116                                      | 50%                                                       |
|        |                   | 2021-04-07 21           | 386                                      | 189                                      | 49%                                                       |                                          |                                          |                                                           |
|        |                   | 2021-04-07 22           | 363                                      | 191                                      | 53%                                                       |                                          |                                          |                                                           |
|        |                   | 2021-04-07 23           | 232                                      | 157                                      | 67%                                                       |                                          |                                          |                                                           |
|        |                   | 2021-04-08 00           | 162                                      | 59                                       | 37%                                                       |                                          |                                          |                                                           |
|        |                   | 2021-04-08 01           | 128                                      | 67                                       | 52%                                                       |                                          |                                          |                                                           |
|        |                   | 2021-04-08 02           | 122                                      | 11                                       | 8.9%                                                      | 356                                      | 35                                       | 9.8%                                                      |
|        | During-<br>2nd PS | 2021-04-08 03           | 318                                      | 57                                       | 18%                                                       |                                          |                                          |                                                           |
|        |                   | 2021-04-08 04           | 598                                      | 82                                       | 14%                                                       |                                          |                                          |                                                           |
|        |                   | 2021-04-08 05           | 488                                      | 25                                       | 5.2%                                                      |                                          |                                          |                                                           |
|        |                   | 2021-04-08 06           | 252                                      | 0                                        | 0%                                                        |                                          |                                          |                                                           |
|        | After             | 2021-04-08 07           | 54                                       | 0                                        | 0%                                                        | 38                                       | 0                                        | 0%                                                        |
|        |                   | 2021-04-08 08           | 21                                       | 0                                        | 0%                                                        |                                          |                                          |                                                           |
| PE III | Before            | 2021-04-08 14           | 29                                       | 0.090                                    | 0.31%                                                     | 50                                       | 0.21                                     | 0.41%                                                     |
|        |                   | 2021-04-08 15           | 48                                       | 0.11                                     | 0.23%                                                     |                                          |                                          |                                                           |
|        |                   | 2021-04-08 16           | 55                                       | 0.14                                     | 0.26%                                                     |                                          |                                          |                                                           |
|        |                   | 2021-04-08 17           | 58                                       | 0.33                                     | 0.58%                                                     |                                          |                                          |                                                           |
|        |                   | 2021-04-08 18           | 61                                       | 0.36                                     | 0.58%                                                     |                                          |                                          |                                                           |
|        | During-<br>1st PS | 2021-04-08 19           | 88                                       | 0.38                                     | 0.43%                                                     | 158                                      | 59                                       | 38%                                                       |
|        |                   | 2021-04-08 20           | 115                                      | 2.4                                      | 2.1%                                                      |                                          |                                          |                                                           |
|        |                   | 2021-04-08 21           | 136                                      | 6.1                                      | 4.5%                                                      |                                          |                                          |                                                           |
|        |                   | 2021-04-08 22           | 129                                      | 19                                       | 15%                                                       |                                          |                                          |                                                           |
|        |                   | 2021-04-08 23           | 124                                      | 24                                       | 20%                                                       |                                          |                                          |                                                           |
|        |                   | 2021-04-09 00           | 128                                      | 33                                       | 26%                                                       |                                          |                                          |                                                           |
|        |                   | 2021-04-09 01           | 132                                      | 62                                       | 47%                                                       |                                          |                                          |                                                           |
|        |                   | 2021-04-09 02           | 150                                      | 67                                       | 45%                                                       |                                          |                                          |                                                           |
|        |                   | 2021-04-09 03           | 161                                      | 75                                       | 47%                                                       |                                          |                                          |                                                           |
|        |                   | 2021-04-09 04           | 175                                      | 111                                      | 64%                                                       |                                          |                                          |                                                           |
|        | During-<br>2nd PS | 2021-04-09 05           | 189                                      | 122                                      | 65%                                                       | 117                                      | 9.4                                      | 8.0%                                                      |
|        |                   | 2021-04-09 06           | 213                                      | 136                                      | 64%                                                       |                                          |                                          |                                                           |
|        |                   | 2021-04-09 07           | 244                                      | 145                                      | 59%                                                       |                                          |                                          |                                                           |
|        |                   | 2021-04-09 08           | 251                                      | 84                                       | 34%                                                       |                                          |                                          |                                                           |
|        |                   | 2021-04-09 09           | 193                                      | 49                                       | 26%                                                       |                                          |                                          |                                                           |
|        |                   | 2021-04-09 10           | 142                                      | 49                                       | 35%                                                       |                                          |                                          |                                                           |
|        |                   | 2021-04-09 11           | 116                                      | 24                                       | 21%                                                       |                                          |                                          |                                                           |
|        |                   | 2021-04-09 12           | 99                                       | 6.9                                      | 7.0%                                                      |                                          |                                          |                                                           |
|        |                   | 2021-04-09 13           | 90                                       | 7.2                                      | 8.0%                                                      |                                          |                                          |                                                           |
|        |                   | 2021-04-09 14           | 90                                       | 4.8                                      | 5.3%                                                      |                                          |                                          |                                                           |
|        |                   | 2021-04-09 15           | 89                                       | 0.33                                     | 0.37%                                                     |                                          |                                          |                                                           |
|        |                   | 2021-04-09 16           | 86                                       | 0.33                                     | 0.38%                                                     |                                          |                                          |                                                           |

|       |            |    |     |      |       |    |   |    |
|-------|------------|----|-----|------|-------|----|---|----|
|       | 2021-04-09 | 17 | 88  | 0.33 | 0.38% |    |   |    |
|       | 2021-04-09 | 18 | 83  | 0    | 0%    |    |   |    |
|       | 2021-04-09 | 19 | 80  | 0    | 0%    |    |   |    |
|       | 2021-04-09 | 20 | 103 | 0    | 0%    |    |   |    |
|       | 2021-04-09 | 21 | 121 | 0    | 0%    |    |   |    |
|       | 2021-04-09 | 22 | 138 | 14   | 10%   |    |   |    |
|       | 2021-04-09 | 23 | 149 | 59   | 40%   |    |   |    |
|       | 2021-04-10 | 00 | 177 | 58   | 33%   |    |   |    |
|       | 2021-04-10 | 01 | 192 | 43   | 23%   |    |   |    |
|       | 2021-04-10 | 02 | 183 | 0.00 | 0%    |    |   |    |
|       | 2021-04-10 | 03 | 160 | 2.9  | 1.8%  |    |   |    |
|       | 2021-04-10 | 04 | 131 | 2.9  | 2.2%  |    |   |    |
|       | 2021-04-10 | 05 | 111 | 2.7  | 2.4%  |    |   |    |
|       | 2021-04-10 | 06 | 104 | 2.6  | 2.5%  |    |   |    |
|       | 2021-04-10 | 07 | 103 | 0.00 | 0%    |    |   |    |
|       | 2021-04-10 | 08 | 96  | 0.00 | 0%    |    |   |    |
|       | 2021-04-10 | 09 | 96  | 0.00 | 0%    |    |   |    |
| After | 2021-04-10 | 10 | 75  | 0.00 | 0%    | 70 | 0 | 0% |
|       | 2021-04-10 | 11 | 64  | 0.00 | 0%    |    |   |    |

---
